# Supplementary figures and images for: Culturally Adapted Cognitive-Behavioral Therapy for Chinese Americans With Depression: A Randomized Controlled Trial
Source: Atypon-hosted journal article supplement (doi:10.1176/appi.ps.201400358), 2015-07-01

**Figure 1.** Flow of participants through each phase of the study

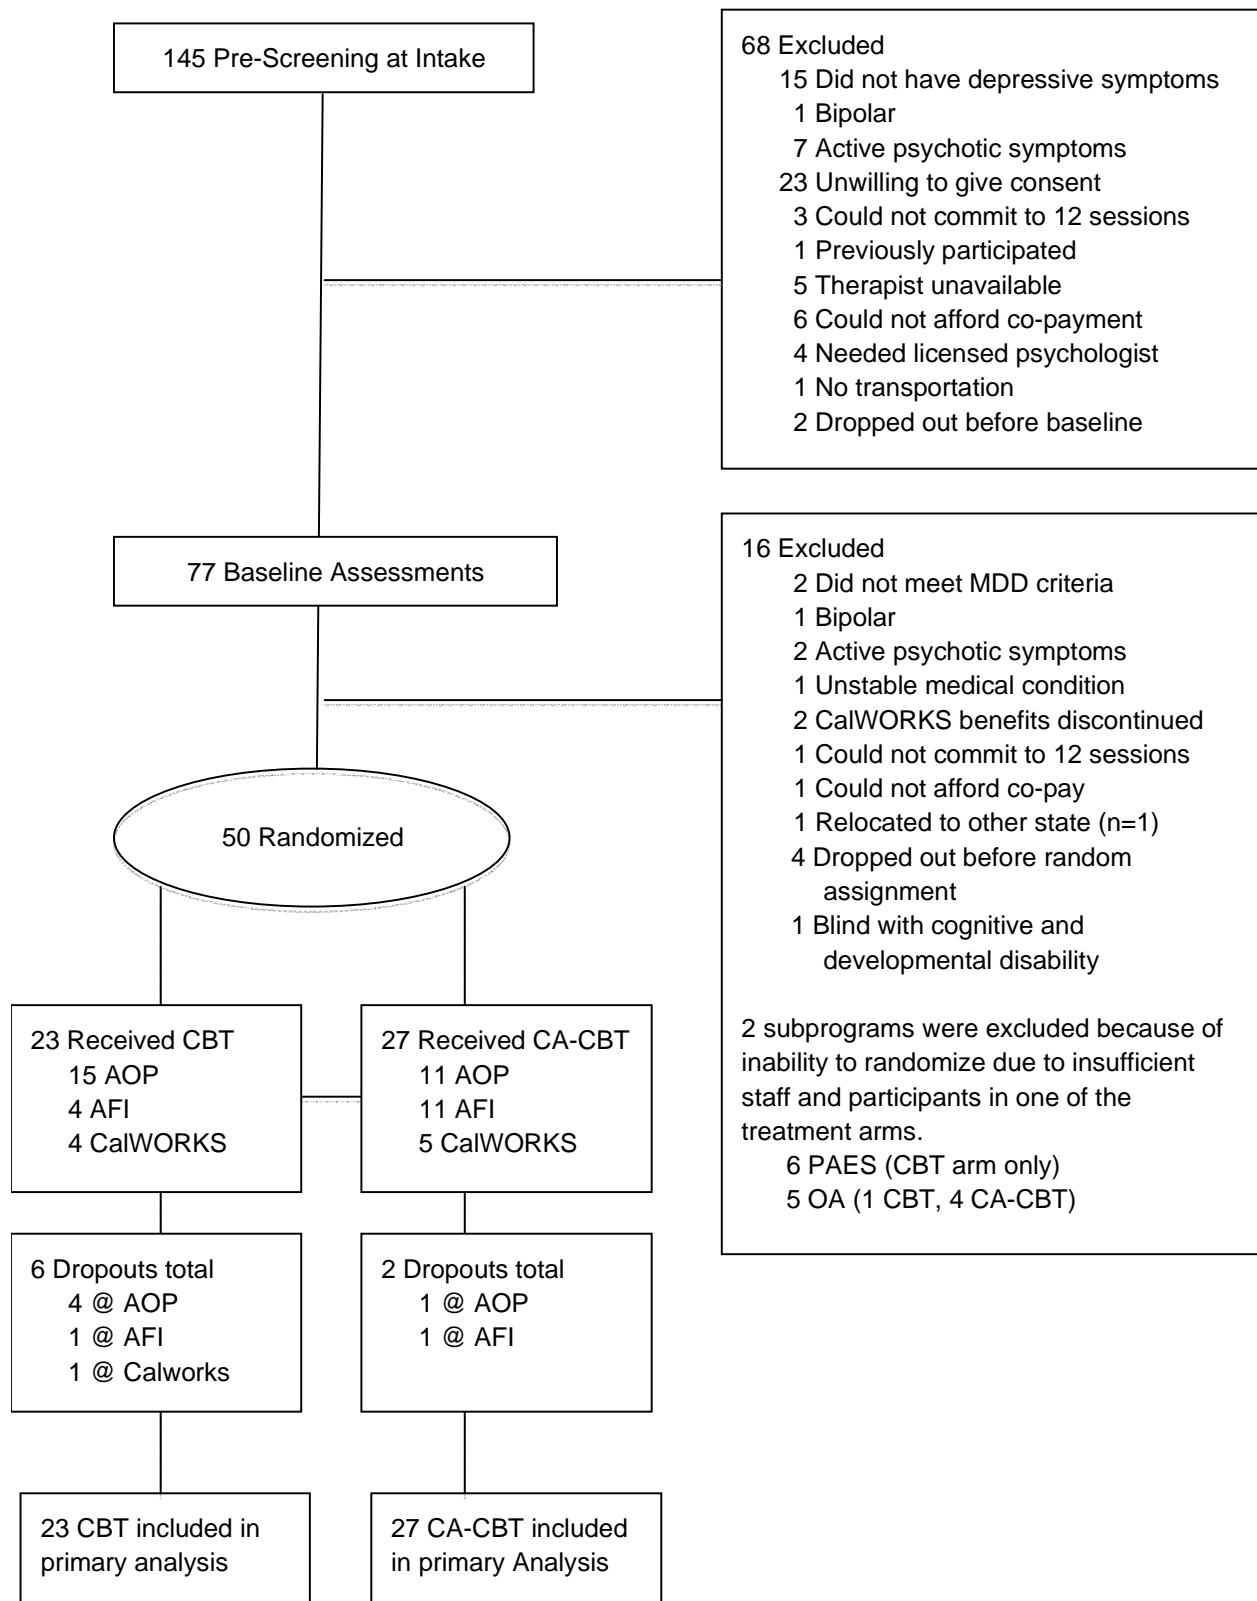

Supplement: appi.ps.201400358.ds001.pdf [file appi.ps.201400358.ds001.pdf]
